# Supplementary material for: IFNβ-dependent increases in STAT1, STAT2, and IRF9 mediate resistance to viruses and DNA damage
Source: PubMed Central journal article supplement (PMC3801437; doi:10.1038/emboj.2013.203), 2013-09-24

Cheon *et al.* Source Data

Figure 2A

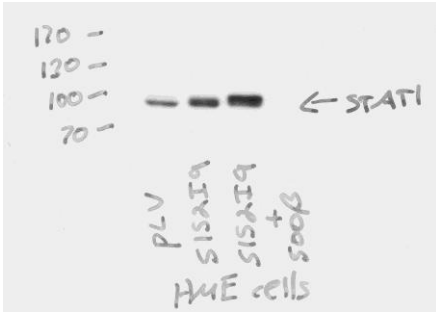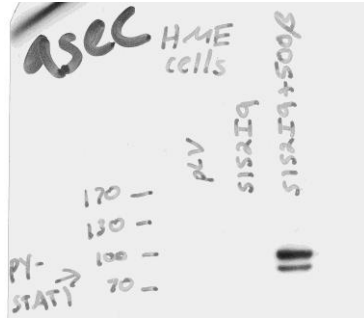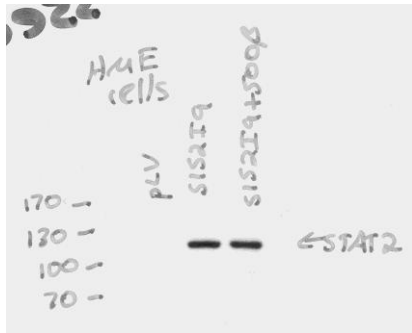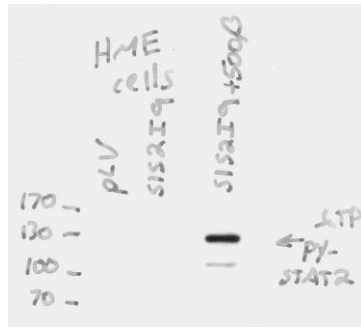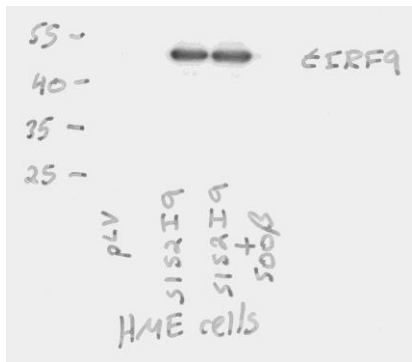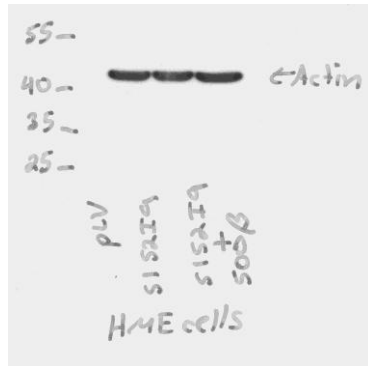

Supplement: emboj2013203df2a.pdf [file emboj2013203df2a.pdf]
